# Supplementary material for: A Physical Mechanism for the Indian Summer Monsoon—Arctic Sea-Ice Teleconnection
Source: MDPI journal article supplement (doi:10.3390/atmos13040566), 2022-03-31
Supplement: s1 [file s1]

Archive with 1 entries (1 files):
- atmosphere-1604422-supplementary.pdf
